# Supplementary material for: PIP2 Interacts Electrostatically with MARCKS-like Protein-1 and ENaC in Renal Epithelial Cells
Source: MDPI journal article supplement (doi:10.3390/biology11121694), 2022-11-24
Supplement: s1 [file s1]

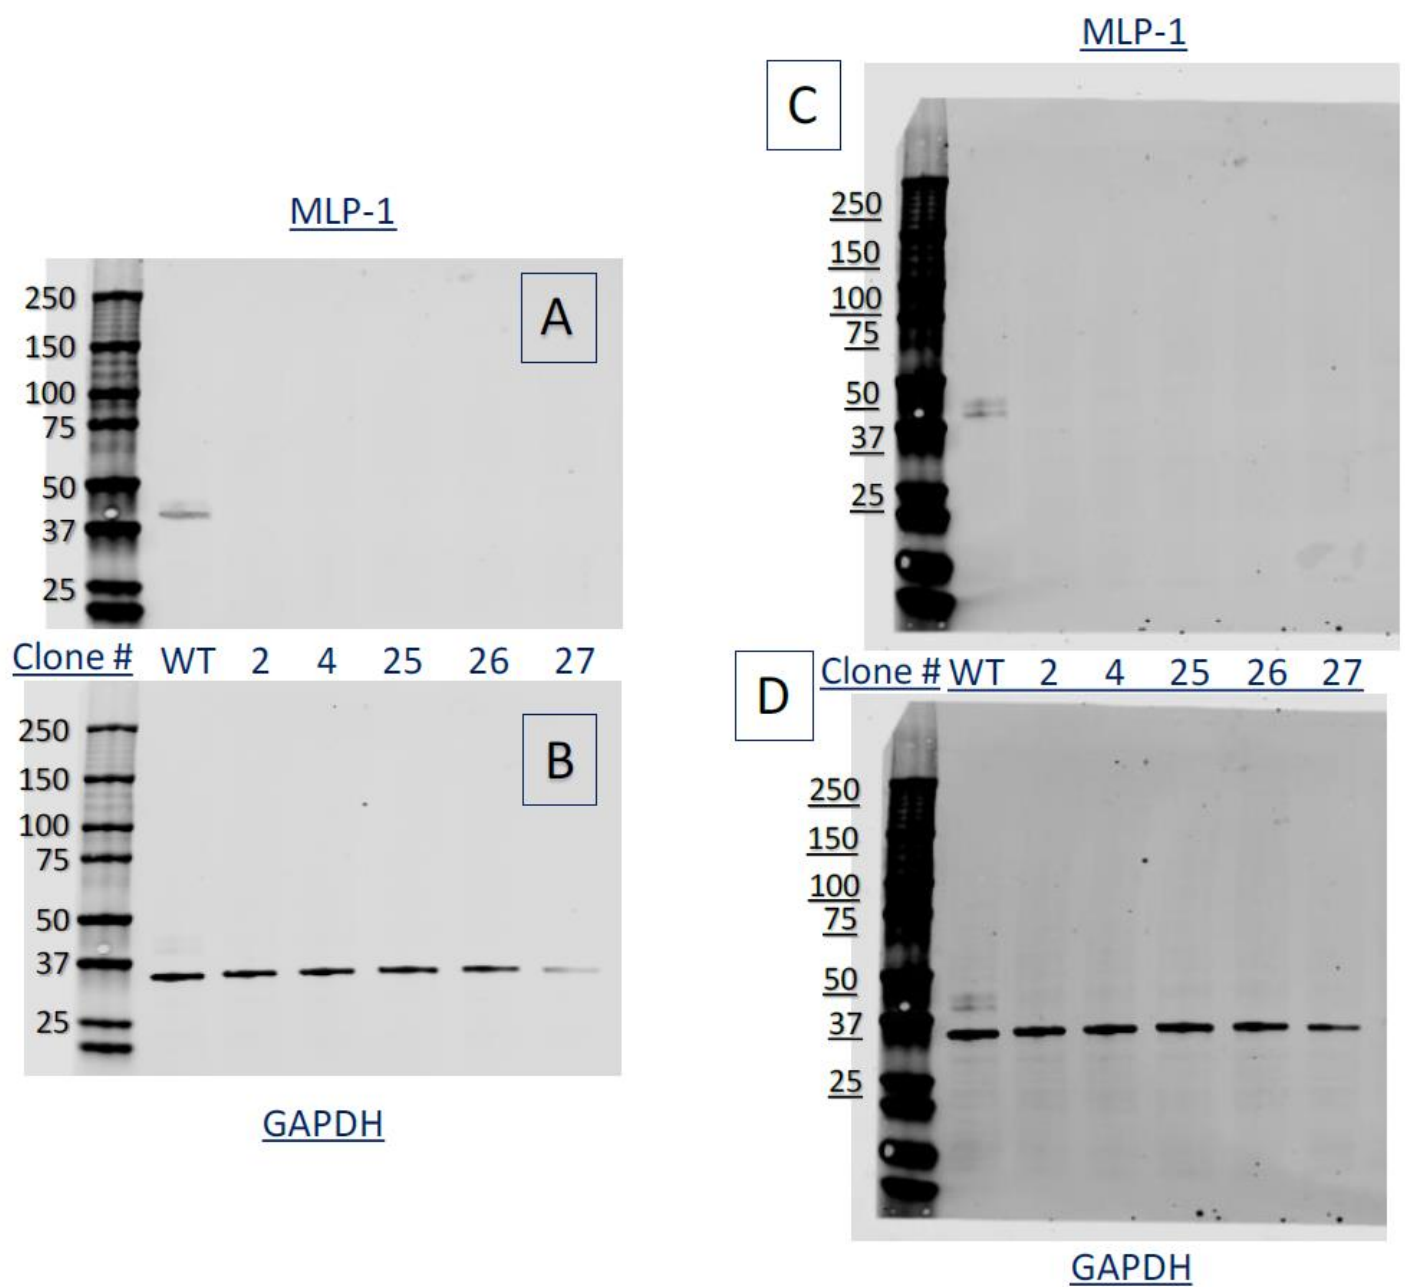

**Supplement Figure S1.** ENaC activity is greatly reduced in mpkCCD cells in which MLP-1 is knocked out. Western blots of wild type and 5 KO clones are shown in A blotted for MLP-1 or GAPDH (in B). MLP-1 is below detection limits in the clonal cells. 12 $\mu$ g total protein was loaded in each lane. On the right are images of the complete blots with C treated with anti-C MLP 1:2000 and D anti-C MLP + anti GAPDH 1:8000. Image D: anti-C MLP + anti GAPDH 1:8000.

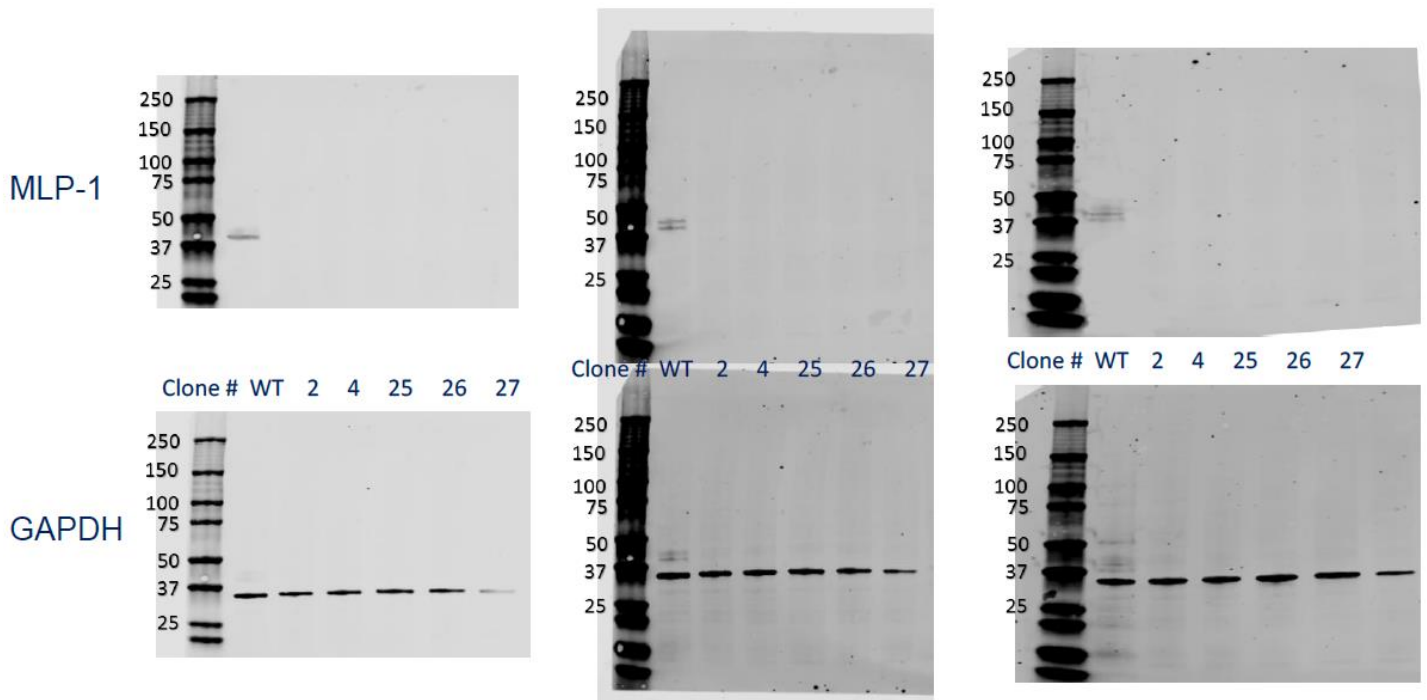

**Supplement Figure S2.** ENaC activity is greatly reduced in mpkCCD cells in which MLP-1 is knocked out. MLP-1 was knocked down 30-fold or more (by Q PCR) using Crispr/Cas9 in several clones. This figure shows 3 Western blots of wild type and 5 KO clones. Upper panels are blotted for MLP-1 (with antibodies described in methods). Wild type (in lane next to MW markers) show MLP-1; in all other lanes for KO clones, MLP-1 is below the level of detection. The lower panels are the same gels probed for GAPDH as a measure of protein loading (12  $\mu$ g).

*Antibodies in this paper.* The following primary antibodies: C-terminal MLP (1:5000, Abcam Cat# ab184546), N-terminal MLP (1:1000, GeneTex Cat# GTX56062), flag (1:2000, Sigma-Aldrich Cat# F1804, RRID:AB\_262044), mcherry (1:5000, OriGene Cat# TA150126), V5 (1:5000, Thermo Fisher Scientific Cat# R960-25, RRID:AB\_2556564),  $\alpha$ -ENaC (1:2000, StressMarq Biosciences Cat# SPC-403, RRID:AB\_10640131),  $\beta$ -ENaC (1:2000, StressMarq Biosciences Cat# SPC-404, RRID:AB\_10644173), and  $\gamma$ -ENaC (1:1000, StressMarq Biosciences Cat# SPC-405D-DY405, RRID:AB\_2825485). The membranes were also probed for beta-actin antibody (Cell Signaling Technology Cat# 3700, RRID:AB\_2242334) or GAPDH antibody (Cell Signaling Technology Cat# 97166, RRID:AB\_2756824) at a dilution of 1:3000 for 2 hours at room temperature as a loading control. The membranes were washed three times with 1 $\times$ TBST for 5 min intervals and then incubated with appropriate species-specific IR Dye secondary antibodies (LI-COR Biosciences Cat# 925-32211, RRID:AB\_2651127, LI-COR Biosciences Cat# 925-68071, RRID:AB\_2721181, LI-COR Biosciences Cat# 926-68072, RRID:AB\_10953628, LI-COR Biosciences Cat# 926-68074, RRID:AB\_10956736) at a dilution of 1:10,000.
